# Supplementary material
Source: publisher site journal article supplement (https://dez.pensoft.net/article/13028/download/suppl/34/)
Supplement: Supplementary file 1

Supplementary material 4

**Strict consensus tree of 7712 most parsimonious trees generated from the primary data matrix**
